# Supplementary material for: A novel near-infrared phosphor Mg2InSbO6:Cr3+ with high quantum efficiency and considerable persistent luminescence duration
Source: Royal Society of Chemistry journal article supplement (doi:10.1039/d2tc01365g), 2022-01-01
Supplement: d2tc01365g1.pdf [file d2tc01365g1.pdf]

## Supporting Information

### **A novel near-infrared phosphor $\text{Mg}_2\text{InSbO}_6:\text{Cr}^{3+}$ with high quantum efficiency and considerable persistent luminescence duration**

Jiangyue Su,<sup>a,b</sup> Ran Pang,<sup>\*a</sup> Tao Tan,<sup>a,b</sup> Shangwei Wang,<sup>a</sup> Weihong Yuan,<sup>a,b</sup> Jiutian Wang,<sup>a,b</sup> Xuexia Chen,<sup>a,b</sup> Haiyan Wu,<sup>a,b</sup> Chengyu Li<sup>\*a,b</sup> and Hongjie Zhang<sup>a,c</sup>

<sup>a</sup> *State key Laboratory of Rare Earth Resource Utilization, Changchun Institute of Applied Chemistry, Chinese Academy of Sciences, Changchun 130022, P. R. China*

<sup>b</sup> *School of Applied Chemistry and Engineering, University of Science and Technology of China, Hefei 230026, China*

<sup>c</sup> *The GBA National Institute for Nanotechnology Innovation, Guangzhou 510535, China*

*\* Corresponding author: Tel: +86-0431-85262258*

*E-mail address: cyli@ciac.ac.cn and pangran@ciac.ac.cn*

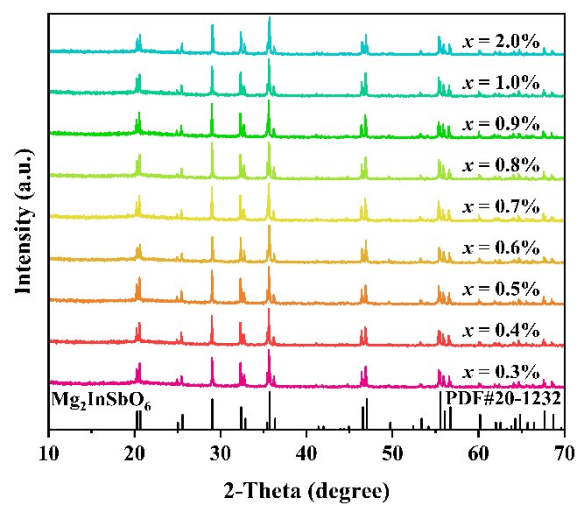

**Fig. S1** X-ray diffraction patterns of MISO: $x\text{Cr}^{3+}$  ( $x = 0.1\text{-}0.7$  mol%).

**Table S1** Rietveld refinement results for  $\text{Mg}_2\text{InSbO}_6:0.003\text{Cr}^{3+}$ 

| Formula                     | $\text{Mg}_2\text{InSbO}_6$ |
|-----------------------------|-----------------------------|
| Crystal system              | the trigonal crystal system |
| Space group                 | $\bar{R}3$ (No. 148)        |
| $a$ (Å)                     | 8.779381(26)                |
| $b$ (Å)                     | 8.779381(26)                |
| $c$ (Å)                     | 10.51128(50)                |
| $\alpha$ (°)                | 90                          |
| $\beta$ (°)                 | 90                          |
| $\gamma$ (°)                | 120                         |
| Volume (Å <sup>3</sup> ), Z | 701.639(40), 6              |
| $R_p$                       | 4.69%                       |
| $R_{wp}$                    | 6.56%                       |
| $\chi^2$                    | 3.095                       |

**Table S2** Crystallographic Data of  $\text{Mg}_2\text{InSbO}_6:0.003\text{Cr}^{3+}$ 

| Atom | Wyckoff Position | x/a     | y/b     | z/c     | S.O.F  | U ( $\text{\AA}^2$ ) |
|------|------------------|---------|---------|---------|--------|----------------------|
| Mg   | 18f              | 0.04073 | 0.26684 | 0.21007 | 0.6667 | 0.0220               |
| In   | 18f              | 0.04073 | 0.26684 | 0.21007 | 0.3333 | 0.0099               |
| Sb1  | 3b               | 0       | 0       | 0.5     | 1      | 0.0104               |
| Sb2  | 3a               | 0       | 0       | 0       | 1      | 0.0110               |
| O1   | 18f              | 0.02694 | 0.20515 | 0.39890 | 1      | 0.0094               |
| O2   | 18f              | 0.18577 | 0.16090 | 0.12220 | 1      | 0.0231               |

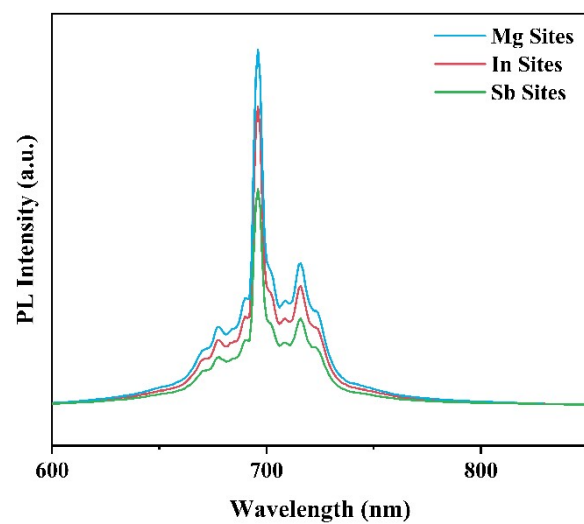

**Fig. S2** PL spectra of doped Cr<sup>3+</sup> on different sites in the MISO host

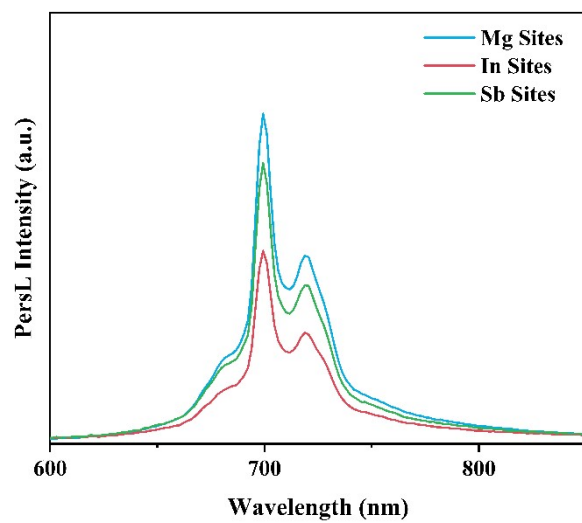

**Fig. S3** PersL spectra of doped  $\text{Cr}^{3+}$  on different sites in the MISO host.

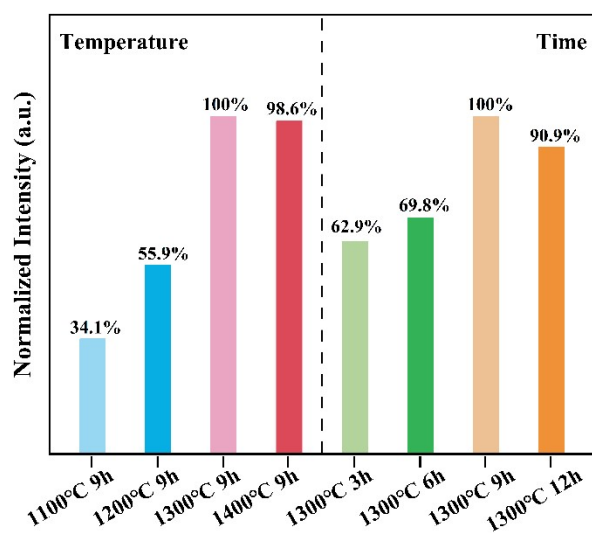

**Fig. S4** The comparison of the integral luminescent intensity of  $\text{MISO:0.003Cr}^{3+}$  phosphors at different calcination temperatures and times.

**Table S3** Important photoluminescence data of certain phosphors with the same  $\text{Mg}_2\text{InSbO}_6$  matrix.

| Phosphor                                   | $\lambda_{\text{ex}}$ (nm) | $\lambda_{\text{em}}$ (nm) | Emission region | $E_a$ (eV) | References |
|--------------------------------------------|----------------------------|----------------------------|-----------------|------------|------------|
| $\text{Mg}_2\text{InSbO}_6:\text{Sm}^{3+}$ | 406                        | 607                        | Orange-red      | 0.20       | 14         |
| $\text{Mg}_2\text{InSbO}_6:\text{Eu}^{3+}$ | 395                        | 612                        | Red             | 0.26       | 15         |
| $\text{Mg}_2\text{InSbO}_6:\text{Mn}^{4+}$ | 301                        | 665                        | Deep-red        | 0.27       | 11         |
| $\text{Mg}_2\text{InSbO}_6:\text{Cr}^{3+}$ | 266                        | 698                        | Near-infrared   | 0.27       | This work  |



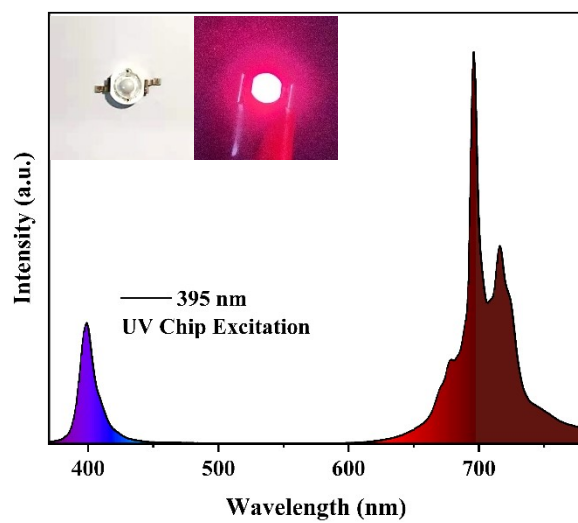

**Fig. S5** EL spectrum of as-prepared LEDs, inset shows digital photos of NIR pc-LED turned off and turned on.

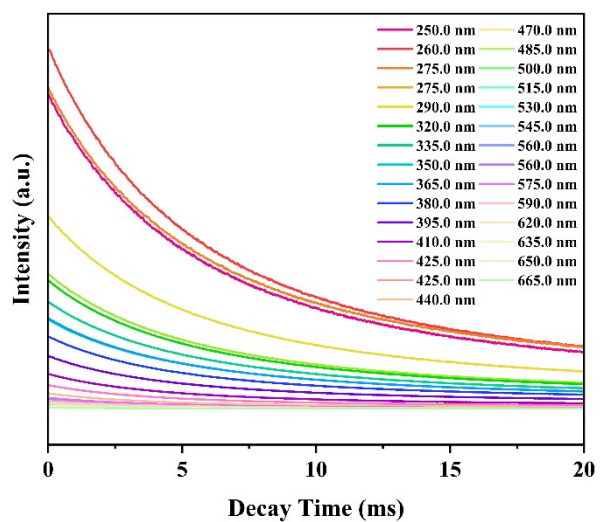

**Fig. S6** The PersL decay curves of MISO:0.003Cr<sup>3+</sup> monitored at 698 nm with different excitation wavelength.

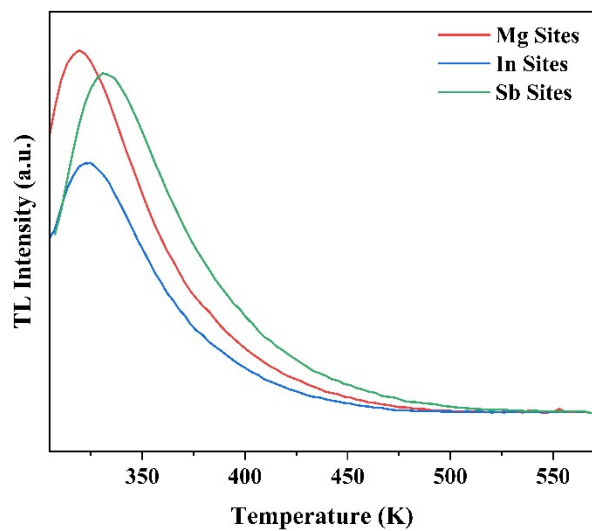

**Fig. S7** TL spectra of doped Cr<sup>3+</sup> on different sites in the MISO host.

**Table S4** ICP analysis of Mg, In, Sb and Cr elements in  $\text{Mg}_{1.98}\text{InSbO}_6:0.02\text{Cr}^{3+}$  samples.

| Nominal<br>composition                              | Element |        |        |      | Mg    | In    | Cr    | Empirical formula                                                 |
|-----------------------------------------------------|---------|--------|--------|------|-------|-------|-------|-------------------------------------------------------------------|
|                                                     | Mg      | In     | Sb     | Cr   | /Sb   | /Sb   | /Sb   |                                                                   |
|                                                     | ppm     | ppm    | ppm    | ppm  | ratio | ratio | ratio |                                                                   |
| $\text{Mg}_{1.98}\text{InSbO}_6:0.02\text{Cr}^{3+}$ | 126300  | 318100 | 331100 | 2642 | 1.91  | 1.01  | 0.02  | $\text{Mg}_{1.91}\text{In}_{1.01}\text{SbO}_6:0.02\text{Cr}^{3+}$ |

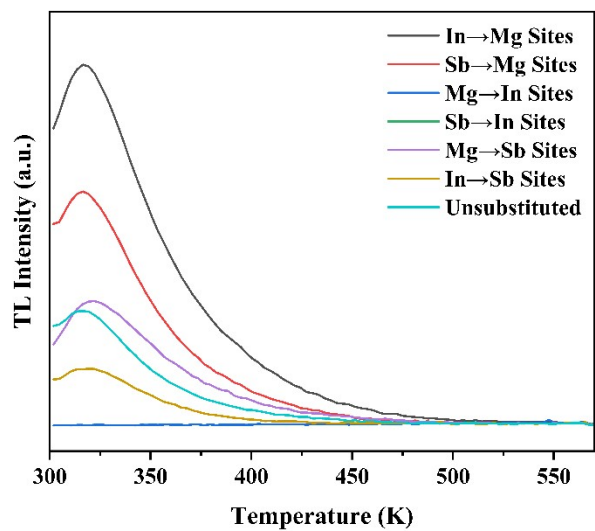

**Fig. S8** The TL spectra of the substituted and unsubstituted samples.

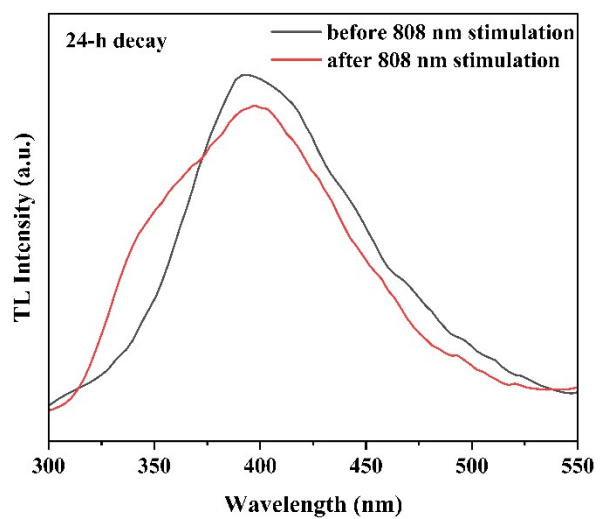

**Fig. S9** The TL curves recorded after stopping irradiation for 24 h without (black line) and with (red line) 808 nm stimulation.

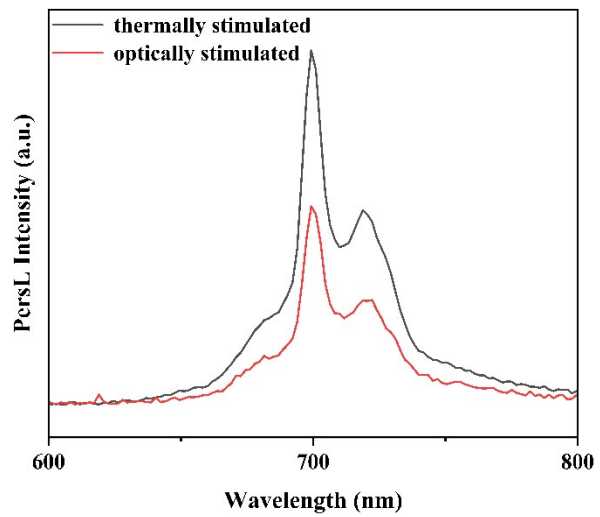

**Fig. S10 The PersL spectra of thermally and optically stimulated luminescence.**
